# Supplementary material
Source: Elsevier journal article supplement (https://www.sciencedirect.com/science/article/pii/S1413355518306749)
Supplement: mmc1 [file S1413355518306749:mmc1.docx]

**Appendix 1**

**Search strategy**

**Databases**

MEDLINE accessed by Pubmed (up to December 2018), Embase (up to December 2018), Cochrane (up to December 2018), SCOPUS (up to December 2018) and Physiotherapy Evidence Database (PEDro) (up to December 2018).

The search of the Pubmed, Embase, Cochrane and SCOPUS databases was using the terms as follows:

1. “Cerebral Palsy” [MESH]
2. “Spastic Cerebral Palsy”
3. “Congenital Cerebral Palsy”
4. or/1-3
5. “Electrical Stimulation”[Mesh]
6. “Electric Stimulation Therapy” [Mesh]
7. “Therapeutic Electrical Stimulation”
8. “Neuromuscular Electrical Stimulation”
9. “Functional Electrical Stimulation”
10. or/5-9
11. randomized controlled trial [pt]
12. controlled clinical trial [pt]
13. randomized controlled trials [mh]
14. random allocation [mh]
15. double-blind method [mh]
16. single-blind method [mh]
17. clinical trial [pt]
18. clinical trials [mh]
19. "clinical trial"[tw]
20. singl*[tw]
21. doubl*[tw]
22. trebl*[tw]
23. tripl*[tw])
24. mask*[tw]
25. blind*[tw]
26. "latin square"[tw]
27. placebos [mh]
28. placebo*[tw]
29. random*[tw]
30. research design [mh: noexp]
31. comparative study [mh]
32. evaluation studies [mh]
33. follow-up studies [mh]
34. prospective studies [mh]
35. crossover studies [mh]
36. control*[tw]
37. prospectiv*[tw]
38. volunteer*[tw])
39. or/11-39
40. 4 AND 10 AND 39

**Database:** PEDro (up to December 2018)

“Cerebral Palsy” AND “Electrical Stimulation” OR “Neuromuscular Electrical Stimulation” OR “Functional Electrical Stimulation”
